# Supplementary material
Source: PubMed Central journal article supplement (PMC9435558)
Supplement: NIHMS1832048-supplement-1.pdf [file NIHMS1832048-supplement-1.pdf]

**Supplemental Table 1:** Unadjusted and Adjusted Odds Ratios of Polypharmacy (as a Continuous Variable) with Geriatric Assessment and Health-Related Quality of Life

| <b>Geriatric Assessment</b>               | <b>Unadjusted Odds,<br/>95% CI</b> | <b>Adjusted Odds*,<br/>95% CI</b> |
|-------------------------------------------|------------------------------------|-----------------------------------|
| ≥1 fall                                   | <b>1.22 (1.14-1.31)</b>            | <b>1.21 (1.12-1.31)</b>           |
| Impaired (≥2) ECOG performance status     | <b>1.08 (1.03-1.14)</b>            | <b>1.08 (1.02-1.15)</b>           |
| Reported limitations in walking one block | <b>1.19 (1.12-1.27)</b>            | <b>1.16 (1.07-1.24)</b>           |
| Any IADL dependence                       | <b>1.16 (1.09-1.23)</b>            | <b>1.13 (1.06-1.21)</b>           |
| Any ADL dependence                        | <b>1.11 (1.05-1.18)</b>            | <b>1.10 (1.02-1.18)</b>           |
| Frail                                     | <b>1.18 (1.11-1.25)</b>            | <b>1.14 (1.06-1.22)</b>           |
| <b>Health-Related Quality of Life</b>     |                                    |                                   |
| Physical health score, ≤40                | <b>1.15 (1.08-1.22)</b>            | <b>1.14 (1.07-1.22)</b>           |
| Mental health score, ≤40                  | <b>1.09 (1.04-1.15)</b>            | <b>1.08 (1.02-1.15)</b>           |

\*Adjusted for age, sex, race, cancer type, cancer stage, and comorbid medical conditions

**Supplemental Table 2:** Comorbidity Assessment on the CARE questionnaire, based upon the OARS questionnaire [22, 23]

|                                                                           |
|---------------------------------------------------------------------------|
| “Do you have any of the following illnesses <b>at the present time?</b> ” |
| Other cancers or leukemia                                                 |
| Arthritis or rheumatism                                                   |
| Glaucoma                                                                  |
| Emphysema or chronic bronchitis                                           |
| High blood pressure                                                       |
| Heart disease                                                             |
| Circulation trouble in arms or legs                                       |
| Diabetes                                                                  |
| Stomach or intestinal disorders                                           |
| Osteoporosis                                                              |
| Chronic liver or kidney disease                                           |
| Stroke                                                                    |
| Depression                                                                |
